# Supplementary material
Source: PubMed Central journal article supplement (PMC7520817)
Supplement: NIHMS1604100-supplement-1.pdf [file NIHMS1604100-supplement-1.pdf]

Supplemental Table 1: PATH Study Waves 1-3: Numbers of Individuals and Numbers of Observations that Could Contribute to GEE Analyses Using the 'All-Waves' Weights.

|                          |                                        | Contributes to adult vs. youth tables for each wave pair in GEE analyses using Waves 1-3 |                     |                            |                             |
|--------------------------|----------------------------------------|------------------------------------------------------------------------------------------|---------------------|----------------------------|-----------------------------|
| Age group† in W1, W2, W3 | Description                            | W1-W2                                                                                    | W2-W3               | N individuals <sup>1</sup> | N observations <sup>1</sup> |
| AAA                      | Adults at all three waves              | adult                                                                                    | adult               | 23,670                     | 47,340                      |
| YYY                      | Youth at all three waves               | youth                                                                                    | youth               | 7,595                      | 15,190                      |
| YYA                      | Youth who aged into adults at W3       | youth                                                                                    | youth               | 1,737                      | 3,474                       |
| YAA                      | Youth who aged into adults at W2       | youth                                                                                    | adult               | 1,714                      | 1,714                       |
| SY Y                     | Shadow youth who aged into youth at W2 | does not contribute                                                                      | youth               | 1,947                      | 1,947                       |
| SS Y                     | Shadow youth who aged into youth at W3 | does not contribute                                                                      | does not contribute | 0                          | 0                           |

Abbreviations: W1= Wave 1; W2= Wave 2; W3= Wave 3, GEE= generalized estimating equation  
 †Age group key: A= Adult; Y=Youth; S=Shadow youth  
<sup>1</sup>Unweighted numbers of individuals and number of observations used will vary by outcome and covariates included in a model  
 Maximum number of individuals for adult analyses (A + A) = 25,384  
 Maximum number of observations for adult analyses ((A X 2) + A) = 49,054  
 Maximum number of individuals for youth analyses (Y + Y + Y+ Y) = 12,993  
 Maximum number of observations for youth analyses ((Y X 2) + (Y X 2) + Y + Y) = 22,325

Supplemental Table 2: Correlates of Discontinuing P30D Use Among P30D Users (Youth 12-17) at Baseline.

|                                                                    | No P30D use at follow-up |             |                  |              |      |             |                  |           |        |             |                  |        |        |             |                  |        |           |             |                  |        |
|--------------------------------------------------------------------|--------------------------|-------------|------------------|--------------|------|-------------|------------------|-----------|--------|-------------|------------------|--------|--------|-------------|------------------|--------|-----------|-------------|------------------|--------|
|                                                                    | Cigarettes               |             |                  |              | ENDS |             |                  |           | Cigars |             |                  |        | Hookah |             |                  |        | Smokeless |             |                  |        |
| Correlates at baseline                                             | %                        | 95% CI      | aOR <sup>1</sup> | 95% CI       | %    | 95% CI      | aOR <sup>1</sup> | 95% CI    | %      | 95% CI      | aOR <sup>1</sup> | 95% CI | %      | 95% CI      | aOR <sup>1</sup> | 95% CI | %         | 95% CI      | aOR <sup>1</sup> | 95% CI |
| <b>Overall</b>                                                     | 32.5                     | (29.0-36.1) | N/A              | N/A          | 55.6 | (51.5-59.6) | N/A              | N/A       | 54.8   | (49.1-60.3) | N/A              | N/A    | 70.8   | (65.4-75.6) | N/A              | N/A    | 36.3      | (29.2-44.1) | N/A              | N/A    |
| <b>DEMOGRAPHIC CHARACTERISTICS</b>                                 |                          |             |                  |              |      |             |                  |           |        |             |                  |        |        |             |                  |        |           |             |                  |        |
| <b>Age group</b>                                                   |                          |             |                  |              |      |             |                  |           |        |             |                  |        |        |             |                  |        |           |             |                  |        |
| 12-14                                                              | 44.8                     | (36.6-53.3) | --               | --           | 67.7 | (59.5-74.9) | --               | --        | #      | #           | --               | --     | #      | #           | --               | --     | 54.7      | (38.4-70.1) | --               | --     |
| 15-17                                                              | 30.4                     | (26.5-34.5) | 0.6              | (0.4-0.9)*   | 52.8 | (48.2-57.2) | 0.6              | (0.2-2.3) | 52.5   | (46.1-58.8) | .                | .      | 67.3   | (61.3-72.8) | .                | .      | 31.8      | (25.6-38.9) | .                | .      |
| <b>Sex</b>                                                         |                          |             |                  |              |      |             |                  |           |        |             |                  |        |        |             |                  |        |           |             |                  |        |
| Female                                                             | 35.4                     | (31.0-40.0) | --               | --           | 58.1 | (50.9-65.1) | --               | --        | 55.9   | (45.2-66.1) | --               | --     | 69.0   | (61.6-75.6) | --               | --     | #         | #           | --               | --     |
| Male                                                               | 29.5                     | (24.6-35.0) | 0.8              | (0.5-1.1)    | 54.0 | (48.4-59.5) | 0.8              | (0.4-1.7) | 54.2   | (47.6-60.7) | .                | .      | 73.0   | (64.9-79.8) | .                | .      | 30.2      | (24.0-37.2) | .                | .      |
| <b>Race/ethnicity</b>                                              |                          |             |                  |              |      |             |                  |           |        |             |                  |        |        |             |                  |        |           |             |                  |        |
| Non-Hispanic White                                                 | 30.1                     | (25.9-34.7) | --               | --           | 48.4 | (42.5-54.3) | --               | --        | 55.2   | (47.5-62.6) | --               | --     | 70.1   | (61.7-77.2) | --               | --     | 32.5      | (25.5-40.3) | --               | --     |
| Non-Hispanic Black                                                 | 37.7                     | (27.3-49.5) | 1.4              | (0.9-2.4)    | #    | #           | #                | #         | 46.2   | (33.2-59.7) | .                | .      | #      | #           | .                | .      | #         | #           | .                | .      |
| Non-Hispanic Other (includes two or more races)                    | 28.4                     | (19.3-39.6) | 0.7              | (0.4-1.3)    | 65.5 | (50.3-78.1) | 1.8              | (0.5-6.9) | #      | #           | .                | .      | #      | #           | .                | .      | #         | #           | .                | .      |
| Hispanic                                                           | 40.9                     | (33.6-48.6) | 1.3              | (0.8-2.1)    | 68.7 | (60.9-75.6) | 2.4              | (0.9-6.7) | 62.8   | (52.4-72.2) | .                | .      | 69.6   | (58.2-79.0) | .                | .      | #         | #           | .                | .      |
| <b>Sexual orientation (ages 14+)</b>                               |                          |             |                  |              |      |             |                  |           |        |             |                  |        |        |             |                  |        |           |             |                  |        |
| Straight/Heterosexual                                              | 32.5                     | (28.7-36.5) | --               | --           | 56.2 | (51.6-60.6) | --               | --        | 52.9   | (46.9-58.8) | --               | --     | 70.1   | (63.8-75.6) | --               | --     | 32.3      | (25.0-40.5) | --               | --     |
| Other (includes gay, lesbian, bisexual, other)                     | 25.2                     | (19.0-32.6) | 0.5              | (0.3-0.9)*   | 51.7 | (39.8-63.5) | .                | .         | 55.0   | (40.7-68.6) | .                | .      | 68.2   | (53.6-80.0) | .                | .      | #         | #           | .                | .      |
| <b>TOBACCO USE CORRELATES</b>                                      |                          |             |                  |              |      |             |                  |           |        |             |                  |        |        |             |                  |        |           |             |                  |        |
| <b>Use of cigarettes</b>                                           |                          |             |                  |              |      |             |                  |           |        |             |                  |        |        |             |                  |        |           |             |                  |        |
| No P30D use                                                        | N/A                      | N/A         | N/A              | N/A          | 59.5 | (54.2-64.6) | --               | --        | 57.6   | (48.2-66.5) | --               | --     | 71.6   | (64.8-77.6) | --               | --     | 34.9      | (26.8-44.1) | --               | --     |
| P30D use                                                           | N/A                      | N/A         | N/A              | N/A          | 50.4 | (43.9-57.0) | 0.8              | (0.5-1.4) | 52.5   | (45.7-59.1) | .                | .      | 69.3   | (60.2-77.1) | .                | .      | 38.8      | (27.3-51.7) | .                | .      |
| <b>Use of ENDS</b>                                                 |                          |             |                  |              |      |             |                  |           |        |             |                  |        |        |             |                  |        |           |             |                  |        |
| No P30D use                                                        | 32.1                     | (28.1-36.4) | --               | --           | N/A  | N/A         | N/A              | N/A       | 55.6   | (47.9-63.1) | --               | --     | 71.8   | (65.2-77.6) | --               | --     | 35.0      | (27.7-43.0) | --               | --     |
| P30D use                                                           | 34.0                     | (27.8-40.8) | 1.2              | (0.8-1.7)    | N/A  | N/A         | N/A              | N/A       | 53.3   | (44.6-61.8) | .                | .      | 67.6   | (57.1-76.7) | .                | .      | 38.8      | (27.1-51.9) | .                | .      |
| <b>Use of cigars</b>                                               |                          |             |                  |              |      |             |                  |           |        |             |                  |        |        |             |                  |        |           |             |                  |        |
| No P30D use                                                        | 31.5                     | (27.8-35.5) | --               | --           | 57.7 | (53.1-62.3) |                  |           | N/A    | N/A         | N/A              | N/A    | 71.3   | (65.2-76.8) | --               | --     | 35.1      | (27.0-44.2) | --               | --     |
| P30D use                                                           | 34.2                     | (27.4-41.8) | 1.4              | (0.9-2.2)    | 47.1 | (37.7-56.8) | 0.9              | (0.2-5.0) | N/A    | N/A         | N/A              | N/A    | 71.2   | (55.3-83.2) | .                | .      | 40.5      | (29.1-53.0) | .                | .      |
| <b>Use of hookah</b>                                               |                          |             |                  |              |      |             |                  |           |        |             |                  |        |        |             |                  |        |           |             |                  |        |
| No P30D use                                                        | 32.1                     | (28.3-36.1) | --               | --           | 56.2 | (51.9-60.3) | --               | --        | 55.3   | (49.4-61.0) | --               | --     | N/A    | N/A         | N/A              | N/A    | 35.5      | (27.8-43.9) | --               | --     |
| P30D use                                                           | 33.9                     | (25.7-43.2) | 1.1              | (0.6-2.0)    | 52.0 | (40.8-63.0) | 1.1              | (0.2-5.3) | 51.6   | (36.2-66.7) | .                | .      | N/A    | N/A         | N/A              | N/A    | #         | #           | .                | .      |
| <b>Use of smokeless</b>                                            |                          |             |                  |              |      |             |                  |           |        |             |                  |        |        |             |                  |        |           |             |                  |        |
| No P30D use                                                        | 33.3                     | (29.6-37.3) | --               | --           | 56.9 | (52.7-61.0) | --               | --        | 56.7   | (50.9-62.2) | --               | --     | 71.0   | (65.3-76.2) | --               | --     | N/A       | N/A         | N/A              | N/A    |
| P30D use                                                           | 23.0                     | (15.4-32.8) | 0.6              | (0.3-1.1)    | 44.7 | (33.5-56.4) | 0.8              | (0.3-2.3) | 49.6   | (37.6-61.6) | .                | .      | #      | #           | .                | .      | N/A       | N/A         | N/A              | N/A    |
| <b>Frequency of use of the given product (in the past 30 days)</b> |                          |             |                  |              |      |             |                  |           |        |             |                  |        |        |             |                  |        |           |             |                  |        |
| 1-19 days                                                          | 41.6                     | (37.0-46.3) | --               | --           | 57.8 | (53.3-62.1) | --               | --        | 55.2   | (48.7-61.4) | --               | --     | 62.0   | (52.7-70.4) | --               | --     | 54.7      | (44.3-64.6) | --               | --     |
| 20-30 days                                                         | 12.4                     | (8.6-17.6)  | 0.2              | (0.1-0.4)*** | 34.9 | (25.2-46.1) | 0.5              | (0.0-4.3) | #      | #           | .                | .      | #      | #           | .                | .      | 10.5      | (5.9-17.9)  | .                | .      |

Notes:  
Abbreviations: P30D = past 30-day; ENDS = electronic nicotine delivery system; aOR = adjusted odds ratio; CI = confidence interval; N/A = not applicable

The percentages and odds ratios in the table are based on weighted data.

Denominator N (unweighted number of observations) for aOR in "Cigarettes" = 799 without sexual orientation, 745 with sexual orientation

Denominator N (unweighted number of observations) for aOR in "ENDS" = 592 without sexual orientation, 557 with sexual orientation

Denominator N (unweighted number of observations) for aOR in "Cigars" = 355 without sexual orientation, 341 with sexual orientation

Denominator N (unweighted number of observations) for aOR in "Hookah" = 137 without sexual orientation, 133 with sexual orientation

Denominator N (unweighted number of observations) for aOR in "Smokeless" = 244 without sexual orientation, 229 with sexual orientation

Tobacco product types were categorized into five groups: cigarettes, ENDS (e-cigarettes at Wave 1, and e-cigarettes, e-cigars, e-pipes, and e-hookah at Waves 2 & 3), cigars (traditional cigars, cigarillos, filtered cigars), hookah, and smokeless tobacco (loose snus, moist snuff, dip, spit, chewing tobacco, and snus pouches).

For each of the five tobacco products, and for any tobacco product, use is defined with respect to the given tobacco product/any tobacco product:  
P30D use is defined as using the product at least once in the past 30 days.

The outcome 'discontinuing P30D use' is defined as no P30D use at follow-up (vs. P30D use at follow-up) among P30D users at baseline. Since no P30D use at baseline is defined with respect to each tobacco product, P30D use of 'other' tobacco products are considered as correlates of no P30D use of the given tobacco product at follow-up.

Tobacco dependence was not assessed among all P30D users and thus is not included in these analyses.

GEE logistic regression analyses were used to assess correlates of no P30D use at follow-up among P30D users at baseline over a one-year period of time (i.e., Wave 1-Wave 2 and Wave 2-Wave 3), including up to two change data points per individual and statistically controlling for the correlation among observations from the same individuals.

All correlates reflect baseline measurement for each wave pair (e.g., when evaluating change between Wave 1 and Wave 2, the age correlate reflects a person's age at Wave 1, and when evaluating change between Wave 2 and Wave 3, the age correlate reflects a person's age at Wave 2).

Data consist of those who are youth at all three waves, youth who age into the adult cohort at Wave 3, shadow youth who age into the youth cohort at Wave 2, and Wave 1-Wave 2 data only from youth who age into the adult cohort at Wave 2 (their Wave 2-Wave 3 data are included in adult tables).

<sup>1</sup>Analyses adjusted for age group, sex, race/ethnicity, each tobacco use correlate, and wave. Sexual orientation (asked only of those 14 and older) was run separately and not included as a covariate in the other aORs.

# Estimates with either a relative standard error greater than 30 or a corresponding denominator less than 50 have been suppressed.

GEE models failed to converge for discontinuing use of cigars, hookah, and smokeless tobacco.

\* p < 0.05

\*\* p < 0.01

\*\*\* p < 0.001

." Indicates the adjusted GEE model was not able to converge, likely due to small cell sizes.

Supplemental Table 3: Correlates of Making a Quit Attempt Among P30D Nonlight Users (Youth 12-17) at Baseline.

|                                                                                                                                                                                                                                                                                                                                                                                                                                                                                                                                                                                                                                                                                                                                                                                                                                                                                                                                                                                                                                                                                                                                                                                                                                                                                                                                                                                                                                                                                                                                                                                                                                                                                                                                                                                                                                                                                                                             | Quit attempt at follow-up |             |                  |            |
|-----------------------------------------------------------------------------------------------------------------------------------------------------------------------------------------------------------------------------------------------------------------------------------------------------------------------------------------------------------------------------------------------------------------------------------------------------------------------------------------------------------------------------------------------------------------------------------------------------------------------------------------------------------------------------------------------------------------------------------------------------------------------------------------------------------------------------------------------------------------------------------------------------------------------------------------------------------------------------------------------------------------------------------------------------------------------------------------------------------------------------------------------------------------------------------------------------------------------------------------------------------------------------------------------------------------------------------------------------------------------------------------------------------------------------------------------------------------------------------------------------------------------------------------------------------------------------------------------------------------------------------------------------------------------------------------------------------------------------------------------------------------------------------------------------------------------------------------------------------------------------------------------------------------------------|---------------------------|-------------|------------------|------------|
|                                                                                                                                                                                                                                                                                                                                                                                                                                                                                                                                                                                                                                                                                                                                                                                                                                                                                                                                                                                                                                                                                                                                                                                                                                                                                                                                                                                                                                                                                                                                                                                                                                                                                                                                                                                                                                                                                                                             | Cigarettes                |             |                  |            |
| Correlates at baseline                                                                                                                                                                                                                                                                                                                                                                                                                                                                                                                                                                                                                                                                                                                                                                                                                                                                                                                                                                                                                                                                                                                                                                                                                                                                                                                                                                                                                                                                                                                                                                                                                                                                                                                                                                                                                                                                                                      | %                         | 95% CI      | aOR <sup>1</sup> | 95% CI     |
| <b>Overall</b>                                                                                                                                                                                                                                                                                                                                                                                                                                                                                                                                                                                                                                                                                                                                                                                                                                                                                                                                                                                                                                                                                                                                                                                                                                                                                                                                                                                                                                                                                                                                                                                                                                                                                                                                                                                                                                                                                                              | 57.8                      | (53.4-62.0) | N/A              | N/A        |
| <b>DEMOGRAPHIC CHARACTERISTICS</b>                                                                                                                                                                                                                                                                                                                                                                                                                                                                                                                                                                                                                                                                                                                                                                                                                                                                                                                                                                                                                                                                                                                                                                                                                                                                                                                                                                                                                                                                                                                                                                                                                                                                                                                                                                                                                                                                                          |                           |             |                  |            |
| <b>Age group</b>                                                                                                                                                                                                                                                                                                                                                                                                                                                                                                                                                                                                                                                                                                                                                                                                                                                                                                                                                                                                                                                                                                                                                                                                                                                                                                                                                                                                                                                                                                                                                                                                                                                                                                                                                                                                                                                                                                            |                           |             |                  |            |
| 12-14                                                                                                                                                                                                                                                                                                                                                                                                                                                                                                                                                                                                                                                                                                                                                                                                                                                                                                                                                                                                                                                                                                                                                                                                                                                                                                                                                                                                                                                                                                                                                                                                                                                                                                                                                                                                                                                                                                                       | 75.0                      | (59.9-85.7) | --               | --         |
| 15-17                                                                                                                                                                                                                                                                                                                                                                                                                                                                                                                                                                                                                                                                                                                                                                                                                                                                                                                                                                                                                                                                                                                                                                                                                                                                                                                                                                                                                                                                                                                                                                                                                                                                                                                                                                                                                                                                                                                       | 55.5                      | (51.0-59.9) | 0.5              | (0.2-1.3)  |
| <b>Sex</b>                                                                                                                                                                                                                                                                                                                                                                                                                                                                                                                                                                                                                                                                                                                                                                                                                                                                                                                                                                                                                                                                                                                                                                                                                                                                                                                                                                                                                                                                                                                                                                                                                                                                                                                                                                                                                                                                                                                  |                           |             |                  |            |
| Female                                                                                                                                                                                                                                                                                                                                                                                                                                                                                                                                                                                                                                                                                                                                                                                                                                                                                                                                                                                                                                                                                                                                                                                                                                                                                                                                                                                                                                                                                                                                                                                                                                                                                                                                                                                                                                                                                                                      | 57.2                      | (50.2-64.0) | --               | --         |
| Male                                                                                                                                                                                                                                                                                                                                                                                                                                                                                                                                                                                                                                                                                                                                                                                                                                                                                                                                                                                                                                                                                                                                                                                                                                                                                                                                                                                                                                                                                                                                                                                                                                                                                                                                                                                                                                                                                                                        | 58.3                      | (52.6-63.8) | 1.1              | (0.7-1.7)  |
| <b>Race/ethnicity</b>                                                                                                                                                                                                                                                                                                                                                                                                                                                                                                                                                                                                                                                                                                                                                                                                                                                                                                                                                                                                                                                                                                                                                                                                                                                                                                                                                                                                                                                                                                                                                                                                                                                                                                                                                                                                                                                                                                       |                           |             |                  |            |
| Non-Hispanic White                                                                                                                                                                                                                                                                                                                                                                                                                                                                                                                                                                                                                                                                                                                                                                                                                                                                                                                                                                                                                                                                                                                                                                                                                                                                                                                                                                                                                                                                                                                                                                                                                                                                                                                                                                                                                                                                                                          | 56.0                      | (50.1-61.6) | --               | --         |
| Non-Hispanic Black                                                                                                                                                                                                                                                                                                                                                                                                                                                                                                                                                                                                                                                                                                                                                                                                                                                                                                                                                                                                                                                                                                                                                                                                                                                                                                                                                                                                                                                                                                                                                                                                                                                                                                                                                                                                                                                                                                          | #                         | #           | 1.7              | (0.6-4.5)  |
| Non-Hispanic Other (includes two or more races)                                                                                                                                                                                                                                                                                                                                                                                                                                                                                                                                                                                                                                                                                                                                                                                                                                                                                                                                                                                                                                                                                                                                                                                                                                                                                                                                                                                                                                                                                                                                                                                                                                                                                                                                                                                                                                                                             | 64.5                      | (48.6-77.8) | 1.1              | (0.5-2.4)  |
| Hispanic                                                                                                                                                                                                                                                                                                                                                                                                                                                                                                                                                                                                                                                                                                                                                                                                                                                                                                                                                                                                                                                                                                                                                                                                                                                                                                                                                                                                                                                                                                                                                                                                                                                                                                                                                                                                                                                                                                                    | 56.5                      | (45.7-66.8) | 1.1              | (0.6-1.9)  |
| <b>Sexual orientation (ages 14+)</b>                                                                                                                                                                                                                                                                                                                                                                                                                                                                                                                                                                                                                                                                                                                                                                                                                                                                                                                                                                                                                                                                                                                                                                                                                                                                                                                                                                                                                                                                                                                                                                                                                                                                                                                                                                                                                                                                                        |                           |             |                  |            |
| Straight/Heterosexual                                                                                                                                                                                                                                                                                                                                                                                                                                                                                                                                                                                                                                                                                                                                                                                                                                                                                                                                                                                                                                                                                                                                                                                                                                                                                                                                                                                                                                                                                                                                                                                                                                                                                                                                                                                                                                                                                                       | 57.8                      | (53.0-62.4) | --               | --         |
| Other (includes gay, lesbian, bisexual, other)                                                                                                                                                                                                                                                                                                                                                                                                                                                                                                                                                                                                                                                                                                                                                                                                                                                                                                                                                                                                                                                                                                                                                                                                                                                                                                                                                                                                                                                                                                                                                                                                                                                                                                                                                                                                                                                                              | 52.2                      | (42.0-62.3) | 0.7              | (0.4-1.3)  |
| <b>TOBACCO USE BEHAVIORS</b>                                                                                                                                                                                                                                                                                                                                                                                                                                                                                                                                                                                                                                                                                                                                                                                                                                                                                                                                                                                                                                                                                                                                                                                                                                                                                                                                                                                                                                                                                                                                                                                                                                                                                                                                                                                                                                                                                                |                           |             |                  |            |
| <b>Use of cigarettes</b>                                                                                                                                                                                                                                                                                                                                                                                                                                                                                                                                                                                                                                                                                                                                                                                                                                                                                                                                                                                                                                                                                                                                                                                                                                                                                                                                                                                                                                                                                                                                                                                                                                                                                                                                                                                                                                                                                                    |                           |             |                  |            |
| No P30D use                                                                                                                                                                                                                                                                                                                                                                                                                                                                                                                                                                                                                                                                                                                                                                                                                                                                                                                                                                                                                                                                                                                                                                                                                                                                                                                                                                                                                                                                                                                                                                                                                                                                                                                                                                                                                                                                                                                 | N/A                       | N/A         | N/A              | N/A        |
| P30D use                                                                                                                                                                                                                                                                                                                                                                                                                                                                                                                                                                                                                                                                                                                                                                                                                                                                                                                                                                                                                                                                                                                                                                                                                                                                                                                                                                                                                                                                                                                                                                                                                                                                                                                                                                                                                                                                                                                    | N/A                       | N/A         | N/A              | N/A        |
| <b>Use of ENDS</b>                                                                                                                                                                                                                                                                                                                                                                                                                                                                                                                                                                                                                                                                                                                                                                                                                                                                                                                                                                                                                                                                                                                                                                                                                                                                                                                                                                                                                                                                                                                                                                                                                                                                                                                                                                                                                                                                                                          |                           |             |                  |            |
| No P30D use                                                                                                                                                                                                                                                                                                                                                                                                                                                                                                                                                                                                                                                                                                                                                                                                                                                                                                                                                                                                                                                                                                                                                                                                                                                                                                                                                                                                                                                                                                                                                                                                                                                                                                                                                                                                                                                                                                                 | 56.8                      | (51.6-61.8) | --               | --         |
| P30D use                                                                                                                                                                                                                                                                                                                                                                                                                                                                                                                                                                                                                                                                                                                                                                                                                                                                                                                                                                                                                                                                                                                                                                                                                                                                                                                                                                                                                                                                                                                                                                                                                                                                                                                                                                                                                                                                                                                    | 59.9                      | (51.6-67.7) | 1.1              | (0.7-1.7)  |
| <b>Use of cigars</b>                                                                                                                                                                                                                                                                                                                                                                                                                                                                                                                                                                                                                                                                                                                                                                                                                                                                                                                                                                                                                                                                                                                                                                                                                                                                                                                                                                                                                                                                                                                                                                                                                                                                                                                                                                                                                                                                                                        |                           |             |                  |            |
| No P30D use                                                                                                                                                                                                                                                                                                                                                                                                                                                                                                                                                                                                                                                                                                                                                                                                                                                                                                                                                                                                                                                                                                                                                                                                                                                                                                                                                                                                                                                                                                                                                                                                                                                                                                                                                                                                                                                                                                                 | 57.4                      | (51.8-62.8) | --               | --         |
| P30D use                                                                                                                                                                                                                                                                                                                                                                                                                                                                                                                                                                                                                                                                                                                                                                                                                                                                                                                                                                                                                                                                                                                                                                                                                                                                                                                                                                                                                                                                                                                                                                                                                                                                                                                                                                                                                                                                                                                    | 57.7                      | (49.0-65.9) | 1.0              | (0.6-1.6)  |
| <b>Use of hookah</b>                                                                                                                                                                                                                                                                                                                                                                                                                                                                                                                                                                                                                                                                                                                                                                                                                                                                                                                                                                                                                                                                                                                                                                                                                                                                                                                                                                                                                                                                                                                                                                                                                                                                                                                                                                                                                                                                                                        |                           |             |                  |            |
| No P30D use                                                                                                                                                                                                                                                                                                                                                                                                                                                                                                                                                                                                                                                                                                                                                                                                                                                                                                                                                                                                                                                                                                                                                                                                                                                                                                                                                                                                                                                                                                                                                                                                                                                                                                                                                                                                                                                                                                                 | 56.8                      | (52.0-61.5) | --               | --         |
| P30D use                                                                                                                                                                                                                                                                                                                                                                                                                                                                                                                                                                                                                                                                                                                                                                                                                                                                                                                                                                                                                                                                                                                                                                                                                                                                                                                                                                                                                                                                                                                                                                                                                                                                                                                                                                                                                                                                                                                    | 63.4                      | (50.8-74.4) | 1.4              | (0.7-2.7)  |
| <b>Use of smokeless</b>                                                                                                                                                                                                                                                                                                                                                                                                                                                                                                                                                                                                                                                                                                                                                                                                                                                                                                                                                                                                                                                                                                                                                                                                                                                                                                                                                                                                                                                                                                                                                                                                                                                                                                                                                                                                                                                                                                     |                           |             |                  |            |
| No P30D use                                                                                                                                                                                                                                                                                                                                                                                                                                                                                                                                                                                                                                                                                                                                                                                                                                                                                                                                                                                                                                                                                                                                                                                                                                                                                                                                                                                                                                                                                                                                                                                                                                                                                                                                                                                                                                                                                                                 | 59.0                      | (53.7-64.1) | --               | --         |
| P30D use                                                                                                                                                                                                                                                                                                                                                                                                                                                                                                                                                                                                                                                                                                                                                                                                                                                                                                                                                                                                                                                                                                                                                                                                                                                                                                                                                                                                                                                                                                                                                                                                                                                                                                                                                                                                                                                                                                                    | 47.4                      | (35.1-60.0) | 0.6              | (0.3-1.2)  |
| <b>Frequency of use of the given product (in the past 30 days)</b>                                                                                                                                                                                                                                                                                                                                                                                                                                                                                                                                                                                                                                                                                                                                                                                                                                                                                                                                                                                                                                                                                                                                                                                                                                                                                                                                                                                                                                                                                                                                                                                                                                                                                                                                                                                                                                                          |                           |             |                  |            |
| 10-19 days                                                                                                                                                                                                                                                                                                                                                                                                                                                                                                                                                                                                                                                                                                                                                                                                                                                                                                                                                                                                                                                                                                                                                                                                                                                                                                                                                                                                                                                                                                                                                                                                                                                                                                                                                                                                                                                                                                                  | 63.8                      | (57.1-70.0) | --               | --         |
| 20-30 days                                                                                                                                                                                                                                                                                                                                                                                                                                                                                                                                                                                                                                                                                                                                                                                                                                                                                                                                                                                                                                                                                                                                                                                                                                                                                                                                                                                                                                                                                                                                                                                                                                                                                                                                                                                                                                                                                                                  | 50.9                      | (44.3-57.4) | 0.9              | (0.5-1.4)  |
| <b>Mean tobacco dependence score<sup>2</sup></b>                                                                                                                                                                                                                                                                                                                                                                                                                                                                                                                                                                                                                                                                                                                                                                                                                                                                                                                                                                                                                                                                                                                                                                                                                                                                                                                                                                                                                                                                                                                                                                                                                                                                                                                                                                                                                                                                            | 52.2                      | (49.2-55.1) | 0.8              | (0.6-1.0)* |
| Notes:<br>Abbreviations: P30D = past 30-day; ENDS = electronic nicotine delivery system; aOR = adjusted odds ratio; CI = confidence interval; N/A = not applicable                                                                                                                                                                                                                                                                                                                                                                                                                                                                                                                                                                                                                                                                                                                                                                                                                                                                                                                                                                                                                                                                                                                                                                                                                                                                                                                                                                                                                                                                                                                                                                                                                                                                                                                                                          |                           |             |                  |            |
| The percentages and odds ratios in the table are based on weighted data.<br>Denominator N (unweighted number of observations) for aOR in "Cigarettes" = 500 with sexual orientation, 472 without sexual orientation                                                                                                                                                                                                                                                                                                                                                                                                                                                                                                                                                                                                                                                                                                                                                                                                                                                                                                                                                                                                                                                                                                                                                                                                                                                                                                                                                                                                                                                                                                                                                                                                                                                                                                         |                           |             |                  |            |
| Use is defined with respect to the given tobacco product (e.g., Cigarettes):<br>Making a cigarette quit attempt is defined as having tried to quit smoking cigarettes in the past 12 months at follow-up or not being a past 30-day cigarette smoker at follow-up.<br>P30D use is defined as using the product at least once in the past 30 days.<br>P30D non-light cigarette use is defined as use on at least 10 of the past 30 days.                                                                                                                                                                                                                                                                                                                                                                                                                                                                                                                                                                                                                                                                                                                                                                                                                                                                                                                                                                                                                                                                                                                                                                                                                                                                                                                                                                                                                                                                                     |                           |             |                  |            |
| The outcome 'making a quit attempt' is defined as a quit attempt at follow-up (vs. no quit attempt at follow-up) among those who were P30D non-light users at baseline. Since no P30D use at baseline is defined with respect to each tobacco product, P30D use of 'other' tobacco products at baseline are considered as correlates of 'making a quit attempt' of the given tobacco product at follow-up.                                                                                                                                                                                                                                                                                                                                                                                                                                                                                                                                                                                                                                                                                                                                                                                                                                                                                                                                                                                                                                                                                                                                                                                                                                                                                                                                                                                                                                                                                                                  |                           |             |                  |            |
| GEE logistic regression analyses were used to assess correlates of making a quit attempt at follow-up among those who were P30D nonlight users at baseline over a one-year period of time (i.e., Wave 1-Wave 2 and Wave 2-Wave 3), including up to two change data points per individual and statistically controlling for the correlation among observations from the same individuals.<br>All correlates reflect baseline measurement for each wave pair (e.g., when evaluating change between Wave 1 and Wave 2, the age correlate reflects a person's age at Wave 1, and when evaluating change between Wave 2 and Wave 3, the age correlate reflects a person's age at Wave 2).<br>Data consist of those who are youth at all three waves, youth who age into the adult cohort at Wave 3, shadow youth who age into the youth cohort at Wave 2, and Wave 1-Wave 2 data only from youth who age into the adult cohort at Wave 2 (their Wave 2-Wave 3 data are included in adult tables).<br><sup>1</sup> Analyses adjusted for age group, sex, race/ethnicity, each tobacco use correlate, and wave. Sexual orientation (asked only of those 14 and older) was run separately and not included as a covariate in the other aORs.<br><sup>2</sup> Tobacco dependence score was defined as described and validated by Strong et al. (2017). Weighted means are presented with 95% confidence intervals. To estimate odds ratios and 95% confidence intervals, the tobacco dependence variable was scaled to a mean of 0 with standard deviation of 1 for each tobacco product (therefore, ORs indicate the likelihood of the outcome per standard deviation unit increase in the level of tobacco dependence for each tobacco product).<br># Estimates with either a relative standard error greater than 30 or a corresponding denominator less than 50 have been suppressed.<br>* p <0.05<br>** p <0.01<br>*** p <0.001 |                           |             |                  |            |

Supplemental Table 4: Correlates of Quitting Among Quit Attempters Who were P30D Nonlight Users (Youth 12-17) at Baseline and Made a Quit Attempt at Follow-Up.

|                                                                                                                                                                                                                                                                                                                                                                                                                                                                                                   | No P30D use at follow-up |             |                  |        |
|---------------------------------------------------------------------------------------------------------------------------------------------------------------------------------------------------------------------------------------------------------------------------------------------------------------------------------------------------------------------------------------------------------------------------------------------------------------------------------------------------|--------------------------|-------------|------------------|--------|
|                                                                                                                                                                                                                                                                                                                                                                                                                                                                                                   | Cigarettes               |             |                  |        |
| Correlates at baseline                                                                                                                                                                                                                                                                                                                                                                                                                                                                            | %                        | 95% CI      | aOR <sup>1</sup> | 95% CI |
| <b>Overall</b>                                                                                                                                                                                                                                                                                                                                                                                                                                                                                    | 38.9                     | (32.9-45.3) | N/A              | N/A    |
| <b>DEMOGRAPHIC CHARACTERISTICS</b>                                                                                                                                                                                                                                                                                                                                                                                                                                                                |                          |             |                  |        |
| <b>Age group</b>                                                                                                                                                                                                                                                                                                                                                                                                                                                                                  |                          |             |                  |        |
| 12-14                                                                                                                                                                                                                                                                                                                                                                                                                                                                                             | 49.9                     | (36.7-63.1) | --               | --     |
| 15-17                                                                                                                                                                                                                                                                                                                                                                                                                                                                                             | 37.0                     | (30.7-43.7) | .                |        |
| <b>Sex</b>                                                                                                                                                                                                                                                                                                                                                                                                                                                                                        |                          |             |                  |        |
| Female                                                                                                                                                                                                                                                                                                                                                                                                                                                                                            | 42.9                     | (35.1-51.0) | --               | --     |
| Male                                                                                                                                                                                                                                                                                                                                                                                                                                                                                              | 35.3                     | (26.4-45.3) | .                |        |
| <b>Race/ethnicity</b>                                                                                                                                                                                                                                                                                                                                                                                                                                                                             |                          |             |                  |        |
| Non-Hispanic White                                                                                                                                                                                                                                                                                                                                                                                                                                                                                | 38.9                     | (31.1-47.2) | --               | --     |
| Non-Hispanic Black                                                                                                                                                                                                                                                                                                                                                                                                                                                                                | #                        | #           | .                |        |
| Non-Hispanic Other (includes two or more races)                                                                                                                                                                                                                                                                                                                                                                                                                                                   | #                        | #           | .                |        |
| Hispanic                                                                                                                                                                                                                                                                                                                                                                                                                                                                                          | 32.3                     | (20.6-46.8) | .                |        |
| <b>Sexual orientation (ages 14+)</b>                                                                                                                                                                                                                                                                                                                                                                                                                                                              |                          |             |                  |        |
| Straight/Heterosexual                                                                                                                                                                                                                                                                                                                                                                                                                                                                             | 37.7                     | (30.9-45.0) | --               | --     |
| Other (includes gay, lesbian, bisexual, other)                                                                                                                                                                                                                                                                                                                                                                                                                                                    | 34.7                     | (23.8-47.4) | .                |        |
| <b>TOBACCO USE BEHAVIORS</b>                                                                                                                                                                                                                                                                                                                                                                                                                                                                      |                          |             |                  |        |
| <b>Use of cigarettes</b>                                                                                                                                                                                                                                                                                                                                                                                                                                                                          |                          |             |                  |        |
| No P30D use                                                                                                                                                                                                                                                                                                                                                                                                                                                                                       | N/A                      | N/A         | N/A              | N/A    |
| P30D use                                                                                                                                                                                                                                                                                                                                                                                                                                                                                          | N/A                      | N/A         | N/A              | N/A    |
| <b>Use of ENDS</b>                                                                                                                                                                                                                                                                                                                                                                                                                                                                                |                          |             |                  |        |
| No P30D use                                                                                                                                                                                                                                                                                                                                                                                                                                                                                       | 38.2                     | (31.3-45.6) | --               | --     |
| P30D use                                                                                                                                                                                                                                                                                                                                                                                                                                                                                          | 41.0                     | (30.9-52.0) | .                |        |
| <b>Use of cigars</b>                                                                                                                                                                                                                                                                                                                                                                                                                                                                              |                          |             |                  |        |
| No P30D use                                                                                                                                                                                                                                                                                                                                                                                                                                                                                       | 37.9                     | (31.6-44.7) | --               | --     |
| P30D use                                                                                                                                                                                                                                                                                                                                                                                                                                                                                          | 40.3                     | (28.7-53.1) | .                |        |
| <b>Use of hookah</b>                                                                                                                                                                                                                                                                                                                                                                                                                                                                              |                          |             |                  |        |
| No P30D use                                                                                                                                                                                                                                                                                                                                                                                                                                                                                       | 38.2                     | (31.5-45.4) | --               | --     |
| P30D use                                                                                                                                                                                                                                                                                                                                                                                                                                                                                          | #                        | #           | .                |        |
| <b>Use of smokeless</b>                                                                                                                                                                                                                                                                                                                                                                                                                                                                           |                          |             |                  |        |
| No P30D use                                                                                                                                                                                                                                                                                                                                                                                                                                                                                       | 38.1                     | (31.6-45.1) | --               | --     |
| P30D use                                                                                                                                                                                                                                                                                                                                                                                                                                                                                          | #                        | #           | .                |        |
| <b>Frequency of use of the given product (in the past 30 days)</b>                                                                                                                                                                                                                                                                                                                                                                                                                                |                          |             |                  |        |
| 10-19 days                                                                                                                                                                                                                                                                                                                                                                                                                                                                                        | 50.6                     | (42.2-58.9) | --               | --     |
| 20-30 days                                                                                                                                                                                                                                                                                                                                                                                                                                                                                        | 22.9                     | (16.0-31.5) | .                |        |
| <b>Mean tobacco dependence score<sup>2</sup></b>                                                                                                                                                                                                                                                                                                                                                                                                                                                  | 48.2                     | (44.2-52.2) | .                |        |
| Notes:                                                                                                                                                                                                                                                                                                                                                                                                                                                                                            |                          |             |                  |        |
| Abbreviations: P30D = past 30-day; ENDS = electronic nicotine delivery system; aOR = adjusted odds ratio; CI = confidence interval; N/A = not applicable                                                                                                                                                                                                                                                                                                                                          |                          |             |                  |        |
| The percentages and odds ratios in the table are based on weighted data.                                                                                                                                                                                                                                                                                                                                                                                                                          |                          |             |                  |        |
| Denominator N (unweighted number of observations) for aOR in "Cigarettes" = 279 with sexual orientation, 257 without sexual orientation                                                                                                                                                                                                                                                                                                                                                           |                          |             |                  |        |
| Use is defined with respect to the given tobacco product (e.g., Cigarettes):<br>P30D use is defined as using the product at least once in the past 30 days.<br>P30D nonlight cigarette use is defined as use on at least 10 of the past 30 days.                                                                                                                                                                                                                                                  |                          |             |                  |        |
| The outcome 'quitting' is defined as no P30D use at follow-up (vs. P30D use at follow-up) among those who were P30D non-light users at baseline and made a quit attempt at follow-up. Since no P30D use at baseline is defined with respect to each tobacco product, P30D use of 'other' tobacco products at baseline are considered as correlates of 'quitting' for the given tobacco product at follow-up.                                                                                      |                          |             |                  |        |
| GEE logistic regression analyses were used to assess correlates of no P30D use at follow-up among P30D nonlight users at baseline who made a quit attempt at follow-up using two wave pairs (i.e., Wave 1-Wave 2 and Wave 2-Wave 3), including up to two change data points per individual and statistically controlling for the correlation among observations from the same individuals.                                                                                                        |                          |             |                  |        |
| All correlates reflect baseline measurement for each wave pair (e.g., when evaluating change between Wave 1 and Wave 2, the age correlate reflects a person's age at Wave 1, and when evaluating change between Wave 2 and Wave 3, the age correlate reflects a person's age at Wave 2).                                                                                                                                                                                                          |                          |             |                  |        |
| Data consist of those who are youth at all three waves, youth who age into the adult cohort at Wave 3, shadow youth who age into the youth cohort at Wave 2, and Wave 1-Wave 2 data only from youth who age into the adult cohort at Wave 2 (their Wave 2-Wave 3 data are included in adult tables).                                                                                                                                                                                              |                          |             |                  |        |
| <sup>1</sup> Analyses adjusted for age group, sex, race/ethnicity, each tobacco use correlate, and wave. Sexual orientation (asked only of those 14 and older) was run separately and not included as a covariate in the other aORs.                                                                                                                                                                                                                                                              |                          |             |                  |        |
| <sup>2</sup> Tobacco dependence score was defined as described and validated by Strong et al. (2017). Weighted means are presented with 95% confidence intervals. To estimate odds ratios and 95% confidence intervals, the tobacco dependence variable was scaled to a mean of 0 with standard deviation of 1 for each tobacco product (therefore, ORs indicate the likelihood of the outcome per standard deviation unit increase in the level of tobacco dependence for each tobacco product). |                          |             |                  |        |
| # Estimates with either a relative standard error greater than 30 or a corresponding denominator less than 50 have been suppressed.                                                                                                                                                                                                                                                                                                                                                               |                          |             |                  |        |
| GEE model failed to converge for cigarettes.                                                                                                                                                                                                                                                                                                                                                                                                                                                      |                          |             |                  |        |
| * p <0.05                                                                                                                                                                                                                                                                                                                                                                                                                                                                                         |                          |             |                  |        |
| ** p <0.01                                                                                                                                                                                                                                                                                                                                                                                                                                                                                        |                          |             |                  |        |
| *** p <0.001                                                                                                                                                                                                                                                                                                                                                                                                                                                                                      |                          |             |                  |        |
| "." Indicates the adjusted GEE model was not able to converge, likely due to small cell sizes.                                                                                                                                                                                                                                                                                                                                                                                                    |                          |             |                  |        |

```

1  /*****
2  * PATH_GEE_MACRO_CORRELATESPAPERS_12072018.SAS *
3  * *
4  * THIS SAS MACRO WAS CREATED FOR PATH CORRELATES PAPERS, TO *
5  * 1. RUN GENERALIZED ESTIMATING EQUATIONS (GEE) MODELS WITH BINARY RESPONSE/OUTCOME VARIABLES AND *
6  * PREDICTORS, USING FULL-SAMPLE AND REPLICATE WEIGHTS (100 HERE). *
7  * (AUTHOR NOTES: THIS IS A QCED TEMPLATE; THIS MACRO CAN BE MODIFIED TO RUN FOR OTHER TYPES OF *
8  * RESPONSE VARIABLES BY SPECIFYING APPROPRIATE DISTRIBUTION AND LINK FUNCTION) *
9  * 2. COMPUTE VARIANCES USING THE BALANCED REPEATED REPLICATION (BRR) METHOD WITH FAY'S ADJUSTMENT (0.3).*
10 * 3. COMPUTE TEST STATISTICS, P VALUES, AND 95% CONFIDENCE LIMITS. *
11 * 4. OUTPUT GEE ODDS RATIO POINT ESTIMATES, 95% CONFIDENCE LIMITS, AND P VALUES, LABELLED WITH RESPONSE *
12 * AND PREDICTOR VARIABLE NAMES AND EFFECT LEVELS (IF CATEGORICAL PREDICTORS). *
13 * *
14 * WHO: CO-AUTHOR OF PATH CORRELATES PAPERS *
15 * WHEN: 1/23/2018 *
16 * 12/7/2018: CO-AUTHOR MODIFIED COMMENTS AND FORMATS FOR JOURNAL SUBMISSION *
17 *****/
18
19
20
21
22
23
24
25
26 *LIBNAME IN '~\PATH\CORRELATES_PAPERS\ANALYSIS\DATA';
27
28
29
30 TITLE 'PROJECT PATH: MULTI-WAVE DERIVED DATASETS (FINAL DRAFT)';
31
32
33
34 OPTIONS NOCENTER NOFMterr LS=155 PS=87;
35
36 %MACRO MAC_GEE0(VAR=, COV=);
37 %LET WHERE= EVR_&VAR = 0 AND EVR_&VAR._FUP IN (0,1) AND WAVE IN (1,2) AND
38     COVVAR >= 0
39     ;
40
41
42 *NON-MISSING OUTCOME AND THE COVARIATES;
43 DATA D2; SET D0; WHERE &WHERE; RUN;
44
45
46
47 TITLE2 "GENMOD (GEE) MACRO: MODELING NEW EVER USE OF &VAR AMONG NEVER USERS";
48 TITLE3 "GENMOD (GEE) MODELING: MAIN-EFFECT OF WAVE AND &COV (FULL-SAMPLE WEIGHTED)";
49 PROC GENMOD DATA=D2;
50     PID WAVE (REF='1')
51     /PARAM=REF;
52     MODEL EVR_&VAR._FUP (EVENT='1') = WAVE &COV/DIST = BIN LINK = LOGIT;
53     REPEATED SUBJECT = PID/ TYPE = UN COVB CORRW;
54     ODS OUTPUT GEEEMPPEST=_EST ;
55     WEIGHT WGT;
56 RUN;
57 DATA EST0; SET _EST;
58     LENGTH OUTCOME $20;
59     OUTCOME="&VAR";
60     WHERE PARM^="INTERCEPT";
61     OBS=_N_;
62 RUN;
63 PROC SORT DATA=EST0;
64     BY OBS;
65 RUN;
66 DATA EST; SET EST0;
67     VAR=0;
68 RUN;
69 %MEND;
70
71
72
73
74
75
76
77
78
79
80
81
82
83
84
85
86
87
88
89
90
91
92
93
94
95
96
97
98
99
100

```

```

1  WEIGHT WGT&I;
2  RUN;
3  DATA EST_&I; SET _EST_&I;
4  LENGTH OUTCOME $20;
5  OUTCOME="&VAR";
6  WHERE PARM^="INTERCEPT";
7  OBS=_N_;
8  RENAME ESTIMATE=EST_&I;
9  RUN;
10 PROC SORT DATA=EST_&I;
11 BY OBS;
12 RUN;
13 DATA EST; MERGE EST EST_&I(KEEP=OBS EST_&I); BY OBS;
14 VAR_&I=(EST_&I-ESTIMATE)**2;
15 VAR=VAR+VAR_&I;
16 RUN;
17 %END;
18 %MEND;
19
20
21 %MAC_GEE0(VAR=OUTCOMEVAR, COV=COVVAR);
22 %MAC_GEE1(VAR=OUTCOMEVAR, COV=COVVAR, N=100);
23
24
25 DATA EST1; SET EST;
26 SE_BRR=SQRT(VAR*0.01); *1/100;
27 SE_BRRFAY=SQRT(VAR*0.020408); *1/(100*(1-0.3)^2);
28 TVALUE_BRR=ESTIMATE/SE_BRR;
29 TVALUE_BRRFAY=ESTIMATE/SE_BRRFAY;
30 PVALUE_BRR=(1-PROBT(ABS(TVALUE_BRR),100))*2;
31 PVALUE_BRRFAY=(1-PROBT(ABS(TVALUE_BRRFAY),100))*2;
32 PVALUE_QC1984=(1-PROBT(ABS(1.984),100))*2;
33 RENAME
34 Z=WGT0_ZVALUE
35 PROBZ=WGT0_PVALUE
36 PARM=VARIABLE
37 LEVEL1=EFFECT;
38 RUN;
39
40 DATA EST2; SET EST1;
41 ODDSRATIOEST=EXP(ESTIMATE);
42 LOWERCL=EXP(ESTIMATE-1.984*SE_BRRFAY);
43 UPPERCL=EXP(ESTIMATE+1.984*SE_BRRFAY);
44 RENAME PVALUE_BRRFAY=PVALUE;
45 RUN;
46
47
48 TITLE2 'GEE (ADJUSTED): MODELING INITIATION- NEW NEW EVER USE AMONG NEVER USERS';
49 TITLE3 "GENMOD (GEE) MACRO PRODUCED BRR SES AND TEST STATS (WITH FAY ADJUSTMENT), OUTPUT GENERATED ON &JOBDATE";
50
51 PROC PRINT DATA=EST2;
52 VAR OUTCOME VARIABLE EFFECT OD: LOWER: UPPER: PVALUE;
53 RUN;

```
